# Supplementary material for: Variation of the factor H-binding protein of Neisseria meningitidis
Source: PubMed Central journal article supplement (PMC2801853; doi:10.1099/mic.0.027995-0), 2009-12

## Supplementary figures

Fig. S1: Distribution of clonal complexes within fHbp peptides.

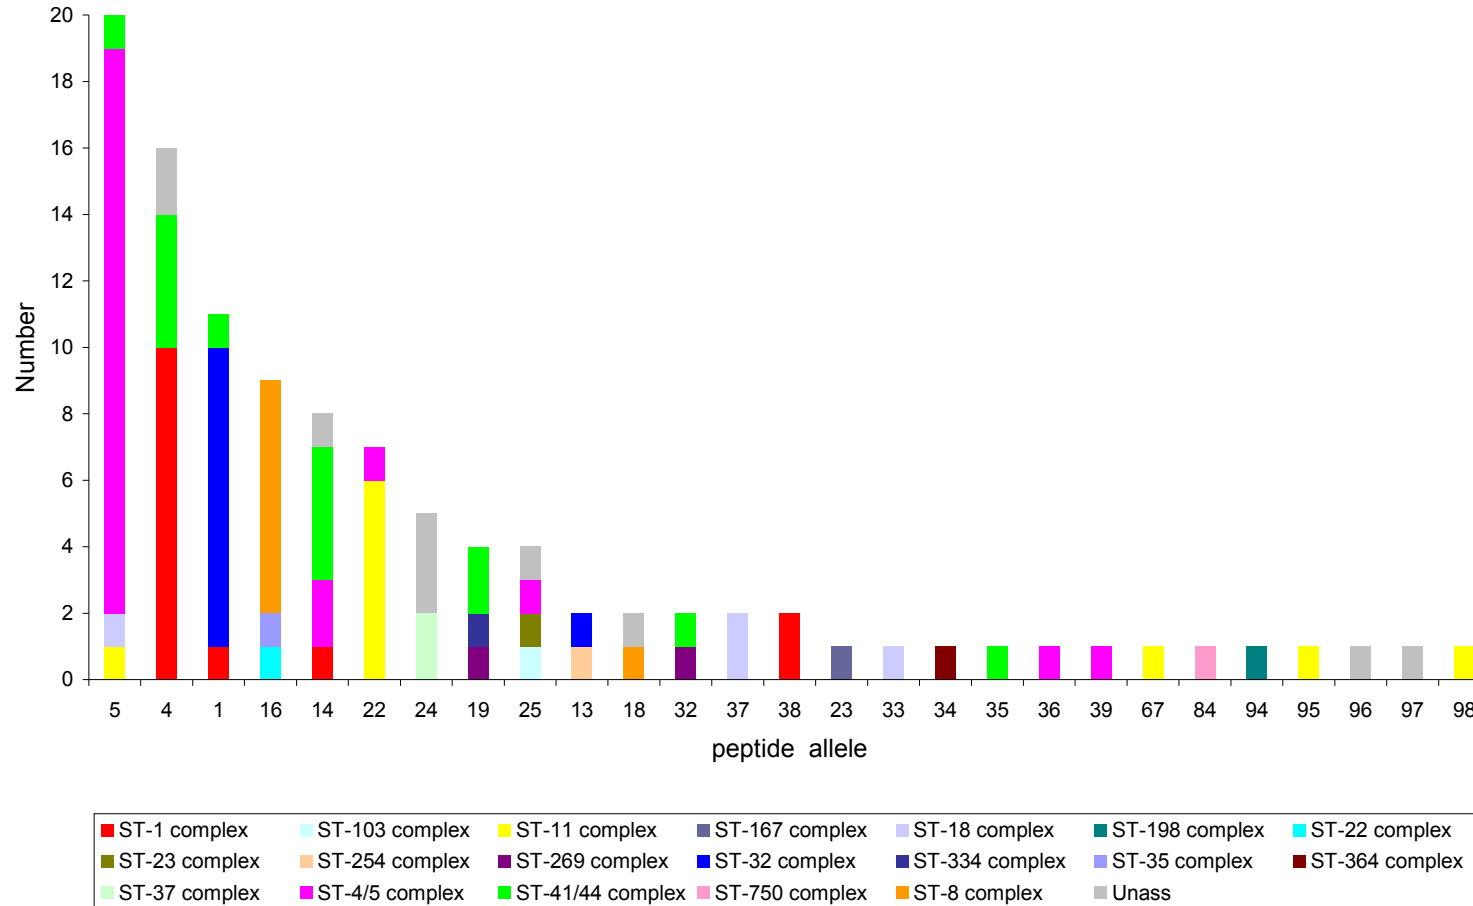

**Fig. S2:** Neighbour-joining tree constructed from aligned peptide sequences indicating association with clonal complex. Bootstrap values shown.

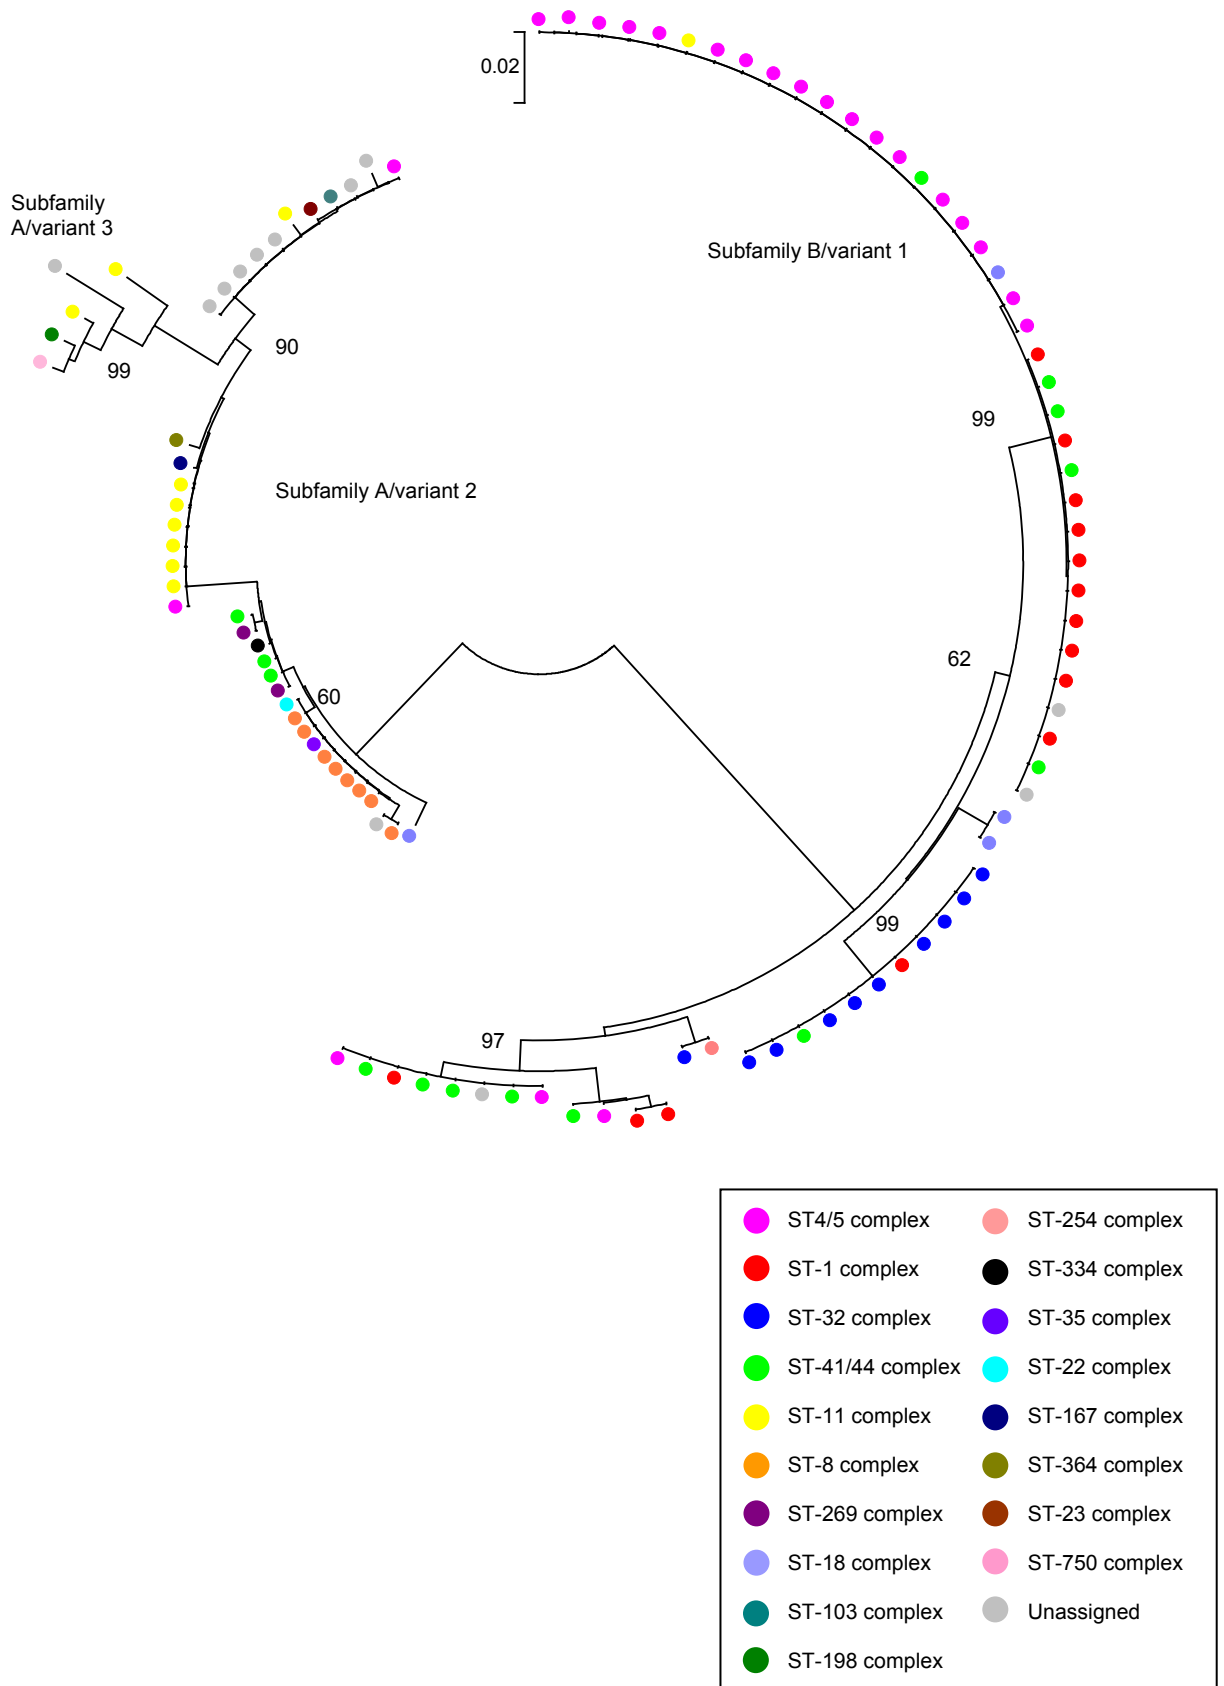

Supplement: NIHMS27735-supplement-1.pdf [file NIHMS27735-supplement-1.pdf]
